# Supplementary material for: Improving the Safety of Medicines in the European Union: From Signals to Action
Source: PubMed Central journal article supplement — Clin Pharmacol Ther. 2019 Dec 6;107(3):521–9. doi: 10.1002/cpt.1678 (PMC7027976; doi:10.1002/cpt.1678), 2019-12-06
Supplement: CPT-107-521-s001.pdf [file CPT-107-521-s001.pdf]

**Table S1:** Signals between September 2012 and June 2018 resulting in Direct Healthcare Professional Communications providing action, advice or changes to current practice

| Active Substance                                                                                                                              | Signal                                                                                                                                             |
|-----------------------------------------------------------------------------------------------------------------------------------------------|----------------------------------------------------------------------------------------------------------------------------------------------------|
| Azithromycin                                                                                                                                  | Increased rate of relapses of haematological malignancies and mortality in hematopoietic stem cell transplantation patients                        |
| Basiliximab                                                                                                                                   | Cardiovascular instability resulting in fatal outcome following off-label use in heart transplantation                                             |
| Bcr-abl tyrosine kinase inhibitors                                                                                                            | Hepatitis B virus reactivation                                                                                                                     |
| Cabazitaxel                                                                                                                                   | Medication error potentially leading to inappropriate dose                                                                                         |
| Canagliflozin*                                                                                                                                | Increased risk of lower limb amputations                                                                                                           |
| Canagliflozin*;<br>Dapagliflozin*;<br>empagliflozin*;                                                                                         | Diabetic ketoacidosis                                                                                                                              |
| Carbimazole;<br>thiamazole                                                                                                                    | New information on the known risk of birth defects and neonatal disorders in case of exposure during pregnancy                                     |
| Cinacalcet                                                                                                                                    | Fatal case with severe hypocalcaemia in a paediatric clinical study                                                                                |
| Cladribine                                                                                                                                    | Progressive multifocal leukoencephalopathy                                                                                                         |
| Daclatasvir; sofosbuvir;<br>sofosbuvir, ledipasvir                                                                                            | Arrhythmia                                                                                                                                         |
| Darbepoetin $\alpha$ ; Epoetin $\alpha$ ;<br>Epoetin $\beta$ ; Epoetin theta;<br>Epoetin zeta;<br>Methoxy polyethylene glycol-epoetin $\beta$ | Severe cutaneous adverse reactions including SJS and TEN                                                                                           |
| Dimethyl fumarate                                                                                                                             | Progressive multifocal leukoencephalopathy                                                                                                         |
| Dolutegravir; abacavir sulfate, dolutegravir sodium, lamivudine;<br>dolutegravir, rilpivirine                                                 | Evaluation of preliminary data from an observational study on birth outcomes in human immunodeficiency virus (HIV)-infected women                  |
| Fentanyl (transdermal patch)                                                                                                                  | Accidental exposure                                                                                                                                |
| Filgrastim, pegfilgrastim                                                                                                                     | Capillary leak syndrome and cytokine release syndrome                                                                                              |
| Fingolimod                                                                                                                                    | Haemophagocytic syndrome                                                                                                                           |
| Fingolimod                                                                                                                                    | Progressive multifocal leukoencephalopathy                                                                                                         |
| Human fibrinogen, human thrombin                                                                                                              | Intestinal obstruction                                                                                                                             |
| Hydrochlorothiazide                                                                                                                           | Skin cancer                                                                                                                                        |
| Interferon $\beta$ 1a & $\beta$ 1b                                                                                                            | Thrombotic microangiopathy                                                                                                                         |
| Lenograstim                                                                                                                                   | Systemic capillary leak syndrome                                                                                                                   |
| Leuprorelin, suspension for injection                                                                                                         | Medication error - wrong technique in drug usage process                                                                                           |
| Levetiracetam (oral solution)                                                                                                                 | Medication errors associated with accidental overdoses                                                                                             |
| Mycophenolate mofetil                                                                                                                         | Bronchiectasis and hypogammaglobulinaemia                                                                                                          |
| Radium 223                                                                                                                                    | Fractures and fatal cases in chemotherapy-naive patients                                                                                           |
| Riociguat                                                                                                                                     | Increased mortality and SAEs in patients with pulmonary hypertension associated with idiopathic interstitial pneumonias in a single clinical trial |
| Temozolomide                                                                                                                                  | Hepatic failure                                                                                                                                    |
| Tolvaptan                                                                                                                                     | Serious liver injury associated with high dose tolvaptan in patients with polycystic kidney disease                                                |
| Ustekinumab                                                                                                                                   | Exfoliative dermatitis                                                                                                                             |

$\alpha$  alpha;  $\beta$  beta; SAE Serious Adverse Event; SJS Stevens-Johnson Syndrome; TEN Toxic Epidermal Necrolysis; \* including combinations with metformin
